# Supplementary material
Source: Springer Nature journal article supplement (https://www.springermedizin.de/resource/supplementary/12936_2007_412_MOESM7_ESM.pdf/9547390)

(a) Rabbit anti-Pfs25

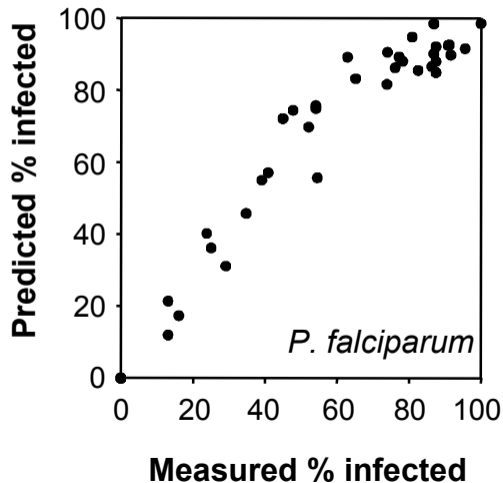

(b) Rhesus anti-Pvs25

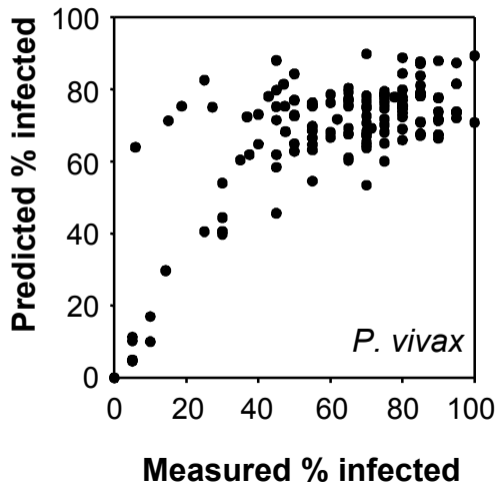

Supplement: MOESM7 [file 9547390]
